# Supplementary material for: Consumers’ Perception and Preference for the Consumption of Wild Game Meat among Adults in Poland
Source: MDPI journal article supplement (doi:10.3390/foods11060830), 2022-03-14
Supplement: s1 [file s1]

## Supplementary material

**Table S1.** Questionnaire structure.

| Question                                                                                                                                                                                                                                                                                                                                                                                                                                                                                                                                                | Variants of Answers                                                                                                                                                                                                   |
|---------------------------------------------------------------------------------------------------------------------------------------------------------------------------------------------------------------------------------------------------------------------------------------------------------------------------------------------------------------------------------------------------------------------------------------------------------------------------------------------------------------------------------------------------------|-----------------------------------------------------------------------------------------------------------------------------------------------------------------------------------------------------------------------|
| Q1. Do you eat wild game?                                                                                                                                                                                                                                                                                                                                                                                                                                                                                                                               | Choose the right answer: (1): yes, (2): no                                                                                                                                                                            |
| Q2. If you do not eat wild game, what are the reasons not to eat it?<br>Q2.1. little availability of wild game, Q2.2. high price of wild game,<br>Q2.3. fear of disease (e.g. trichinosis), Q2.4. no family tradition of<br>eating game, Q2.5. lack of skill in preparing a tasty dish,<br>Q2.6. unacceptable taste of this meat, Q2.7. I believe that good wild<br>game dishes can only be eaten in the restaurant, Q2.8. I am not<br>convinced that this meat is healthier than others meat, Q2.9. ethical<br>aspects, Q2.10. other (Please specify). | Choose the right answer: (1): yes, (2): no                                                                                                                                                                            |
| Q3. How often do you eat a wild game?                                                                                                                                                                                                                                                                                                                                                                                                                                                                                                                   | Choose the right answer: (1): I did not use, (2):<br>rarely than once a year, (3): once every 2–3<br>months, (4): once a month, (5): two-three times<br>a month, (6): once a week, (7): three or four<br>times a week |
| Q4. Circumstances of wild game' dishes consumption? Q4.1. home;<br>Q4.2. at my friends; Q4.3. catering services; Q4.4. I prepare myself;<br>Q4.5. other (Please specify).                                                                                                                                                                                                                                                                                                                                                                               | Choose the right answer: (1): yes, (2): no                                                                                                                                                                            |
| Q5. What is the source of wild game you consume?<br>Q5.1. catering establishments, Q5.2. shop / specialized wholesale,<br>Q5.3. typical shop / supermarket / hypermarket, Q5.4. I hunt my-<br>self, Q5.5. from the hunter (friends or family hunt), Q5.6. other<br>(Please specify).                                                                                                                                                                                                                                                                    | Choose the right answer: (1): yes, (2): no                                                                                                                                                                            |
| Q6. What kind of wild game do you eat most often?                                                                                                                                                                                                                                                                                                                                                                                                                                                                                                       | Choose the right answer: (1): I do not use, (2):<br>rarely than once year, (3): once a 2–3 months,<br>(4): once a month, (5): two-three times a month,<br>(6): once a week, (7): three or four times a week           |
| Q7. What form do you eat wild game most often?<br>Q7.1. wild boar, Q7.2. deer, Q7.3. roe-deer, Q7.4. hare,<br>Q7.5. wild game birds (wild duck, pheasant, wild goose),<br>Q7.6. other (Please specify).                                                                                                                                                                                                                                                                                                                                                 | Choose the right answer: (1): appetizers, (2):<br>soups; (3): main course, (4): cold cuts and other<br>preserves, (5): ingredients of other dishes, (6):<br>other                                                     |
| Q8. If you prepare wild game dishes yourself, which method of<br>heat treatment do you choose? 8.1. cooking, 8.2. frying, 8.3. stew-<br>ing, 8.4. baking, 8.5. grilling, 8.6. raw (e.g. „wild tartare”), 8.7.<br>smoked preserves (sausages, cold cuts and others), 8.8. non-<br>smoked preserves (pates, brawn and others), 8.9. other<br>(Please specify).                                                                                                                                                                                            | Choose the right answer: (0): none, (1): least<br>often, (2): rarely, (3): moderately frequently,<br>(4): quite often, (5) the most often                                                                             |
| Q9. What are the reasons for your interest in consuming wild<br>game? Q9.1. taste preferences - I like wild game, Q9.2. health<br>properties of wild game, Q9.3. the popularity of wild game, Q9.4.<br>meat availability, Q9.5. wild game fashion, Q9.6. family traditions,<br>Q9.7. allergy among family members, Q9.8. hunting and the need<br>to use the obtained meat, Q9.9. other (Please specify).                                                                                                                                                | Choose the right answer: (1): yes, (2): no                                                                                                                                                                            |
| Q10. Do you have concerns about the consumption of wild game?                                                                                                                                                                                                                                                                                                                                                                                                                                                                                           | Choose the right answer: (1): no, (2): some-<br>times, (3): yes                                                                                                                                                       |

|                                                                   |                                                                                                                                                                                                            |
|-------------------------------------------------------------------|------------------------------------------------------------------------------------------------------------------------------------------------------------------------------------------------------------|
| Q11. Are you hunting? If yes then how long have you been hunting? | Choose the right answer: (1): 0-5 years, (2) 6-10 years, (3): over 11 years                                                                                                                                |
| Gender                                                            | Choose the right answer: (1): women, (2): men                                                                                                                                                              |
| Age                                                               | Choose the right answer: (1): 18–30 years old, (2): 31–40 years old, (3): 41–50 years old, (4): >51 years old                                                                                              |
| Education                                                         | Choose the right answer: (1): vocational or primary school, (2): secondary school, (3): higher education (university)                                                                                      |
| Dwelling place                                                    | Choose the right answer: (1): village, (2): city up to 50,000 inhabitants, (3): city between 50,001–100,000 inhabitants, (4): city between 100,001–500,000 inhabitants, (5): city over 500,000 inhabitants |
| Financial situation in own opinion                                | Choose the right answer: (1): very good (2): good, (3): not good not bad, (4): bad and very bad                                                                                                            |
